# Supplementary material for: Novel Eu2+-activated thiogallate phosphors for white LED applications: structural and spectroscopic analysis
Source: Royal Society of Chemistry journal article supplement (doi:10.1039/c8ra01113c), 2018-01-01
Supplement: c8ra01113c1.pdf [file c8ra01113c1.pdf]

# Novel $\text{Eu}^{2+}$ -activated Thiogallate Phosphors for White LED Applications: Structural and Spectroscopic Analysis

*Szu-Ping Lee<sup>†</sup>, Ting-Shan Chan<sup>‡</sup>, Somrita Dutta<sup>†</sup> and Teng-Ming Chen<sup>\*,†</sup>*

<sup>†</sup>Phosphors Research Laboratory, Department of Applied Chemistry and Institute of Molecular Science, National Chiao Tung University, Hsinchu 30010, Taiwan.

<sup>‡</sup>National Synchrotron Radiation Research Center, Hsinchu 30076, Taiwan

## Supporting Information.

The following files are free of charge.

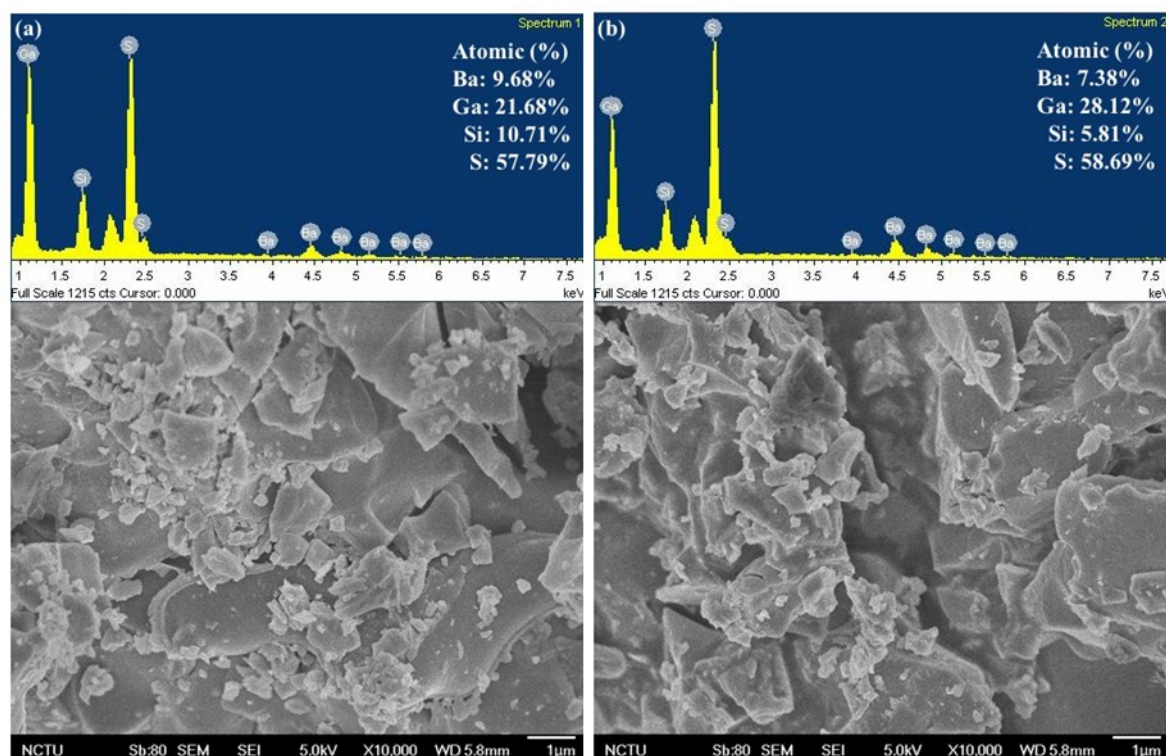

**Figure S1.** EDS spectra and SEM image of as-synthesized (a)  $\text{BaGa}_2\text{SiS}_6$  and (b)  $\text{Ba}_2\text{Ga}_8\text{SiS}_{16}$  phosphor.
